# Supplementary material
Source: MDPI journal article supplement (https://www.mdpi.com/2073-4433/14/7/1115)
Supplement: s1 [file s1]

---

# Supplementary Materials:

Anna Gaspard <sup>1,2,\*</sup>, Martin Simard <sup>2,3,4</sup> and Stéphane Boudreau <sup>1,2</sup>

<sup>1</sup> Département de Biologie, Université Laval, Québec City, QC G1V 0A6, Canada; stephane.boudreau@bio.ulaval.ca

<sup>2</sup> Centre for Northern Studies (CEN), Québec City, QC G1V 0A6, Canada; martin.simard@ggr.ulaval.ca

<sup>3</sup> Département de Géographie, Université Laval, Québec City, QC G1V 0A6, Canada

<sup>4</sup> Center for Forest Research (CEF), Québec City, QC G1V 0A6, Canada

\* Correspondence: anna.gaspard.1@ulaval.ca

**Table S1.** Cover types used from the ecological mapping of the vegetation of northern Québec.

| Cover types                                             | Cover class codes                                                              |
|---------------------------------------------------------|--------------------------------------------------------------------------------|
| Deciduous forest (< 25% of coniferous leaf area)        | Deciduous forest stand (61-80% cover, FB)                                      |
|                                                         | Deciduous forest stand (41-60% cover, FC)                                      |
|                                                         | Deciduous forest stand (26-40% cover, FD)                                      |
|                                                         | Deciduous forest stand (10-25% cover, FL)                                      |
| Mixed forest (coniferous leaf area between 25% and 75%) | Mixed forest stand (41-60% cover, MC)                                          |
|                                                         | Mixed forest stand (26-40% cover, MD)                                          |
|                                                         | Mixed forest stand (10-25% cover, ML)                                          |
| Coniferous forest (coniferous leaf area >75%)           | Coniferous forest stand (41-60% cover) with a deciduous shrub understory (RaC) |
|                                                         | Coniferous forest stand (26-40% cover) with a deciduous shrub understory (RaD) |
|                                                         | Coniferous forest stand (10-25% cover) with a deciduous shrub understory (RaL) |
|                                                         | Coniferous forest stand (>80% cover) with mosses and ericaceous shrubs (RmA)   |
|                                                         | Coniferous forest stand (61-80% cover) with mosses and ericaceous shrubs (RmB) |
|                                                         | Coniferous forest stand (41-60% cover) with mosses and ericaceous shrubs (RmC) |
|                                                         | Coniferous forest stand (26-40% cover) with mosses and ericaceous shrubs (RmD) |
|                                                         | Coniferous forest stand (10-25% cover) with mosses and ericaceous shrubs (RmL) |
| Lichen woodland                                         | Coniferous forest stand (41-60% cover) with a lichen cover >60% (RcC)          |
|                                                         | Coniferous forest stand (26-40% cover) with a lichen cover >60% (RcD)          |
|                                                         | Coniferous forest stand (10-25% cover) with a lichen cover >60% (RcL)          |
|                                                         | Coniferous forest stand (41-60% cover) with a lichen cover from 40-60% (RcmC)  |
|                                                         | Coniferous forest stand (26-40% cover) with a lichen cover from 40-60% (RcmD)  |
|                                                         | Coniferous forest stand (10-25% cover) with a lichen cover from 40-60% (RcmL)  |
| Shrubland with > 70% shrub cover                        | Low shrub in tundra (0.3 to 1 m, AAB)                                          |
|                                                         | High shrub in tundra (> 1 m, AAH)                                              |
|                                                         | Low shrub and thermokarst ponds in tundra (AAM)                                |
|                                                         | Low shrub (0.3 to 2 m, AB)                                                     |
|                                                         | Low shrub and thermokarst ponds (ABM)                                          |
| Shrubland with 30 to 70% shrub cover                    | High shrub (> 2m, AB)                                                          |
|                                                         | Lichen-heath with 30-70% deciduous shrubs (LLA)                                |
|                                                         | Subarctic lichen-heath with 30-70% deciduous shrubs (LSA)                      |
|                                                         | Erect-shrub tundra with frostboils and 30-70% erect shrubs (TAO)               |
|                                                         | Erect-shrub tundra with 30-70% erect shrubs (TDA)                              |

|                                        |                                                              |
|----------------------------------------|--------------------------------------------------------------|
| Shrubland with < 30%<br>shrub cover    | Lichen-heath (LL)                                            |
|                                        | Subarctic lichen-heath (LS)                                  |
|                                        | Subarctic lichen-heath of snow bed (LSC)                     |
|                                        | Subarctic lichen-heath and thermokarst ponds (LSM)           |
|                                        | Erect shrub tundra (TD)                                      |
|                                        | Erect shrub tundra of snow bed TDC)                          |
|                                        | Erect shrub tundra with thermokarst ponds (TDM)              |
|                                        | Erect shrub tundra with frostboils (TDO)                     |
| Rock substrate-dominated<br>vegetation | Lichen-heath with > 10% rock substrate (LLR)                 |
|                                        | Subarctic lichen-heath with 10-50% rock substrate (LSR)      |
|                                        | Subarctic lichen-heath dominated by the rock substrate (RLS) |
|                                        | Erect shrub tundra dominated by the rock substrate (RTD)     |
|                                        | Prostrate shrub tundra dominated by the rock substrate (RTP) |
| Prostrate-shrub tundra                 | Erect shrub tundra with 10-50% rock substrate (TDR)          |
|                                        | Herb tundra with prostrate shrubs (TH)                       |
|                                        | Prostrate shrub tundra (TP)                                  |
| Wetland                                | Prostrate shrub tundra with frost-boils (TPO)                |
|                                        | Freshwater marsh/shrub swamp (MR)                            |
|                                        | Saltwater marsh (MS)                                         |
|                                        | Arctic fen with 30-70% erect shrubs (TAA)                    |
|                                        | Arctic fen or wet tundra (TAR)                               |
|                                        | Riparian fen (TMR)                                           |
|                                        | String fen (TMS)                                             |
|                                        | Uniform fen (TMU)                                            |
|                                        | Bog with pools (TOM)                                         |
|                                        | Palsa peatland (TOP)                                         |
|                                        | Patterned bog without pools (TOR)                            |
|                                        | Patterned bog with pools (TOS)                               |
|                                        | Uniform bog (TOU)                                            |
| Bedrock                                | Rock outcrops and fragments (AR)                             |
|                                        | Boulder fields (CB)                                          |
|                                        | Snow (NE)                                                    |
|                                        | Bare ground (SD)                                             |

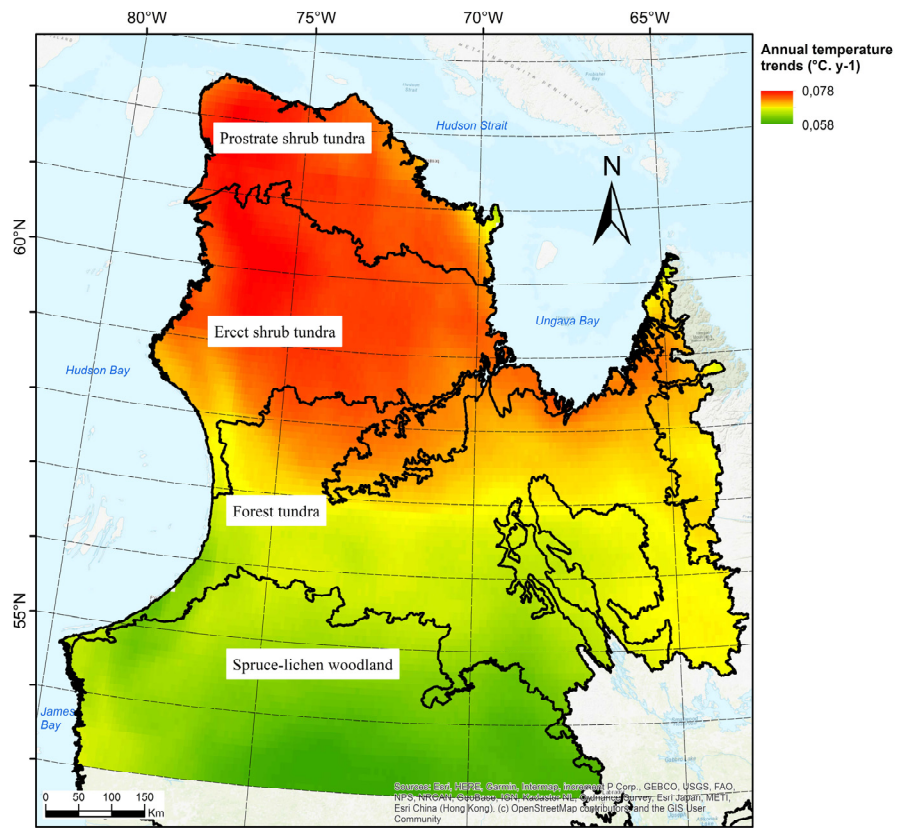

**Figure S1.** Annual temperature trends for the 1992-2020 period in Nunavik.

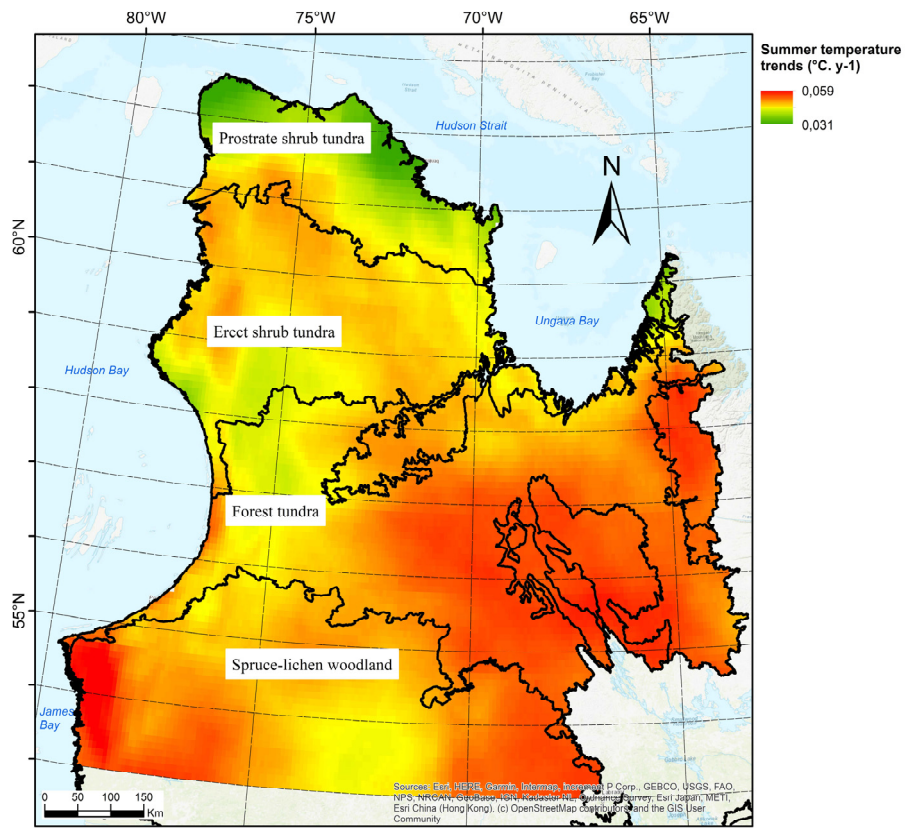

**Figure S2.** Summer temperature trends for the 1992-2020 period in Nunavik.

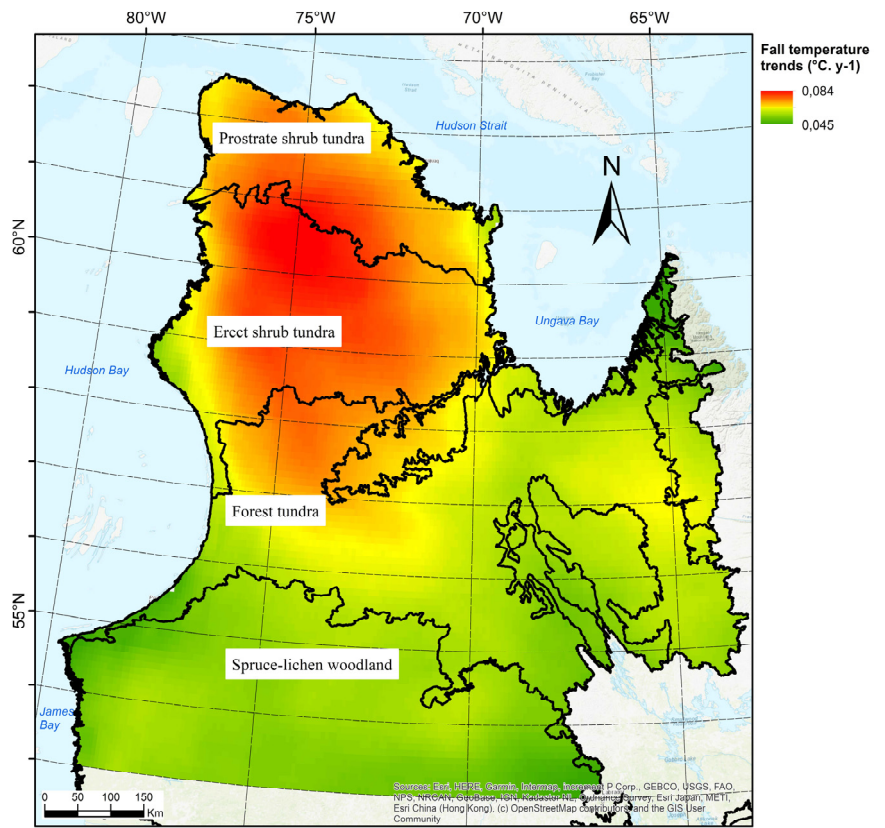

**Figure S3.** Fall temperature trends for the 1992-2020 period in Nunavik.



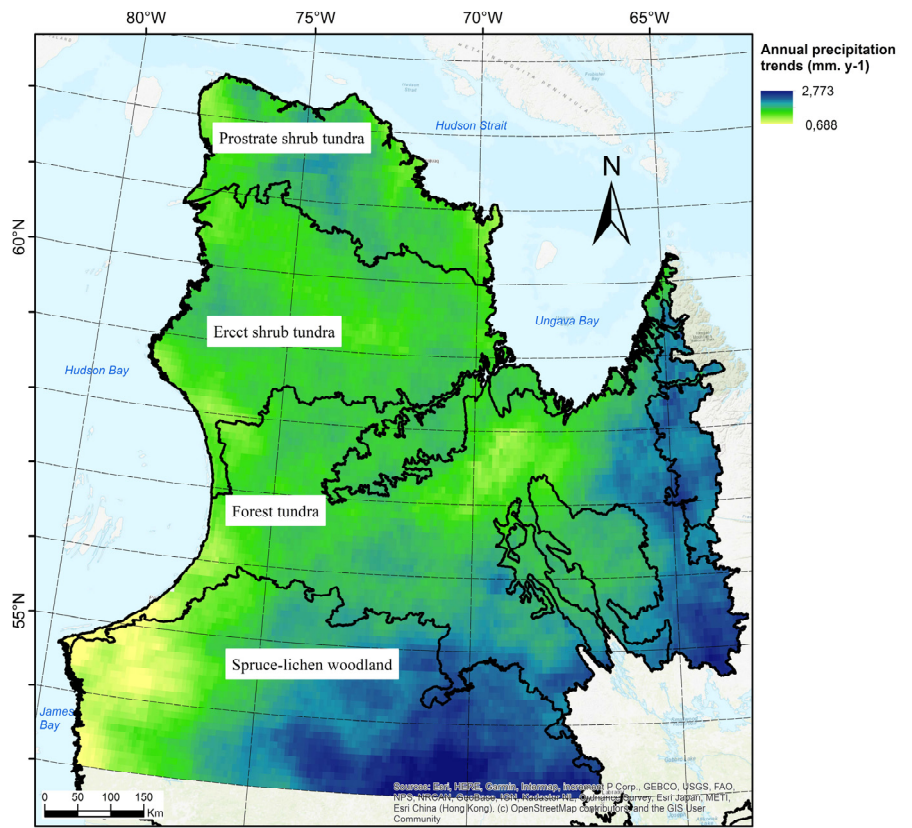

**Figure S5.** Annual precipitation trends for the 1992-2020 period in Nunavik.









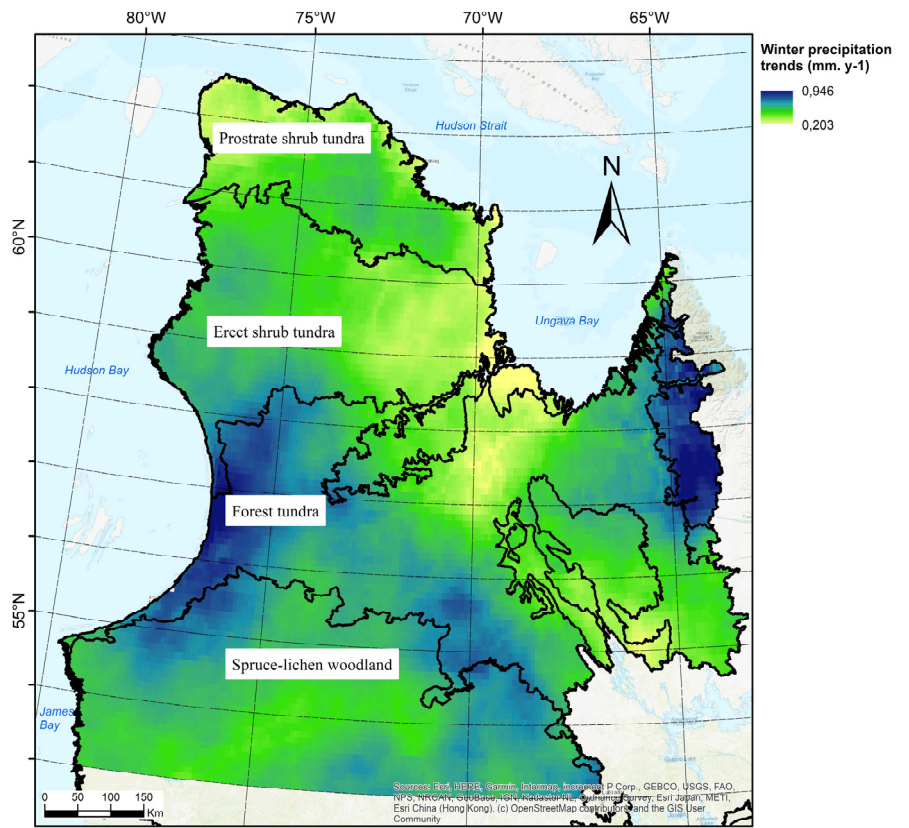

**Figure S8.** Winter precipitation trends for the 1992-2020 period in Nunavik.

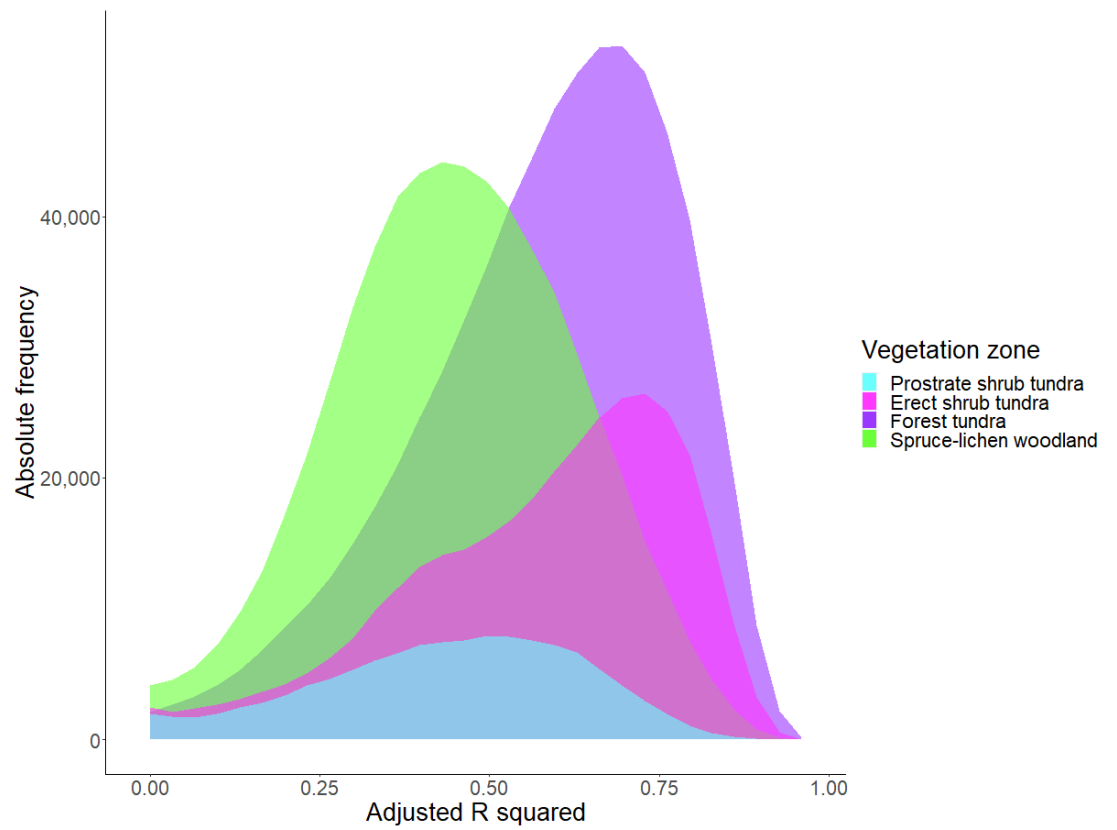

**Figure S9.** Frequency distribution of the adjusted R-squared values obtained from the NDVI time series regressions conducted on vegetation polygons over the period of 1992-2020. This histogram provides an overview of the goodness-of-fit of the regression models and indicate the variability in explained variance across the vegetation polygons.

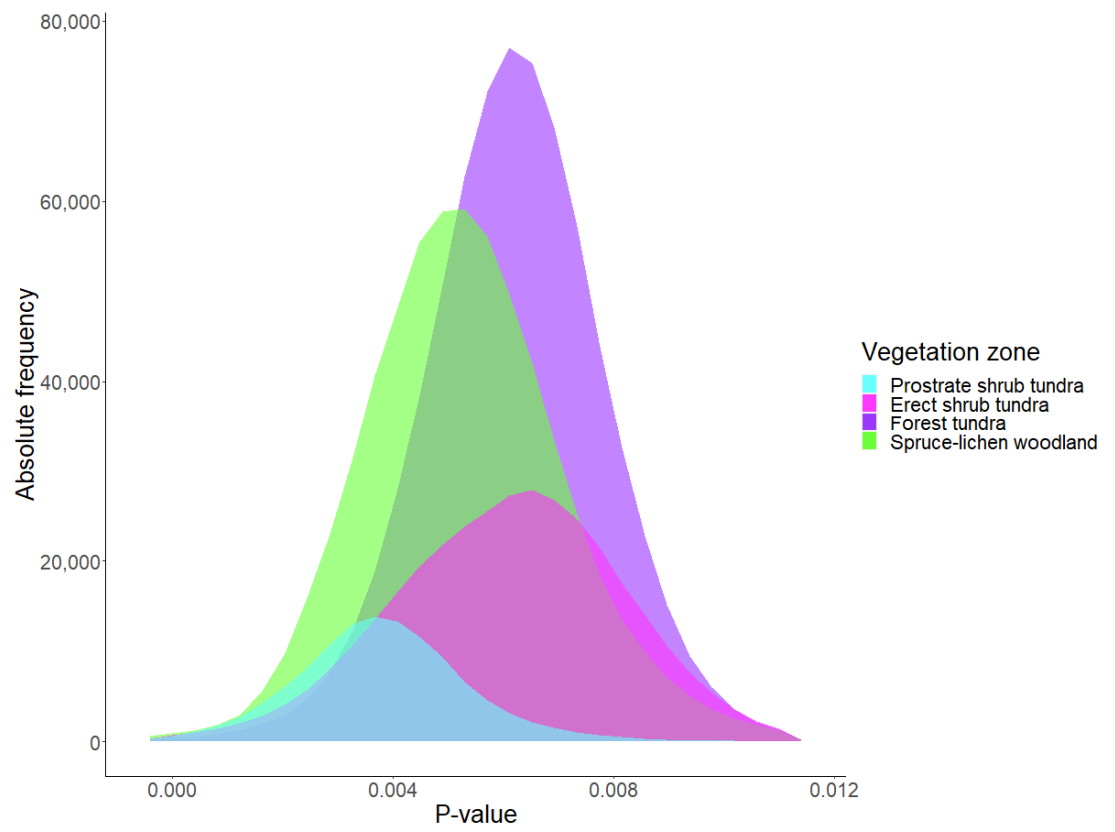

**Figure S10.** Frequency distribution of the p-values resulting from the NDVI time series regressions conducted on vegetation polygons over the period of 1992-2020. This histogram provides insight into the statistical significance of the regression models and help evaluate the strength of the relationships between NDVI and the vegetation polygons.

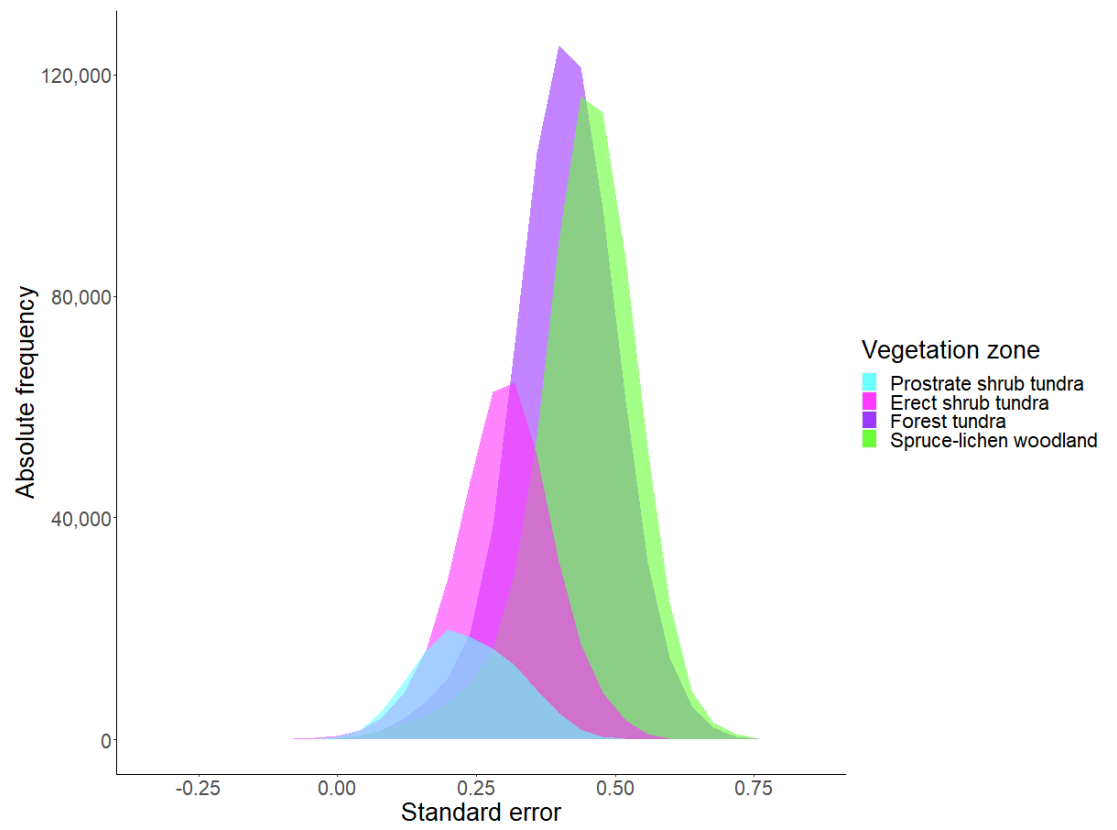

**Figure S11.** Frequency distribution of the standard error of regression for the NDVI time series regressions performed on vegetation polygons throughout the period of 1992-2020. This histogram offers insights into the variability and precision of the regression models' predictions, providing an assessment of the overall reliability of the regression analysis on the vegetation polygons.

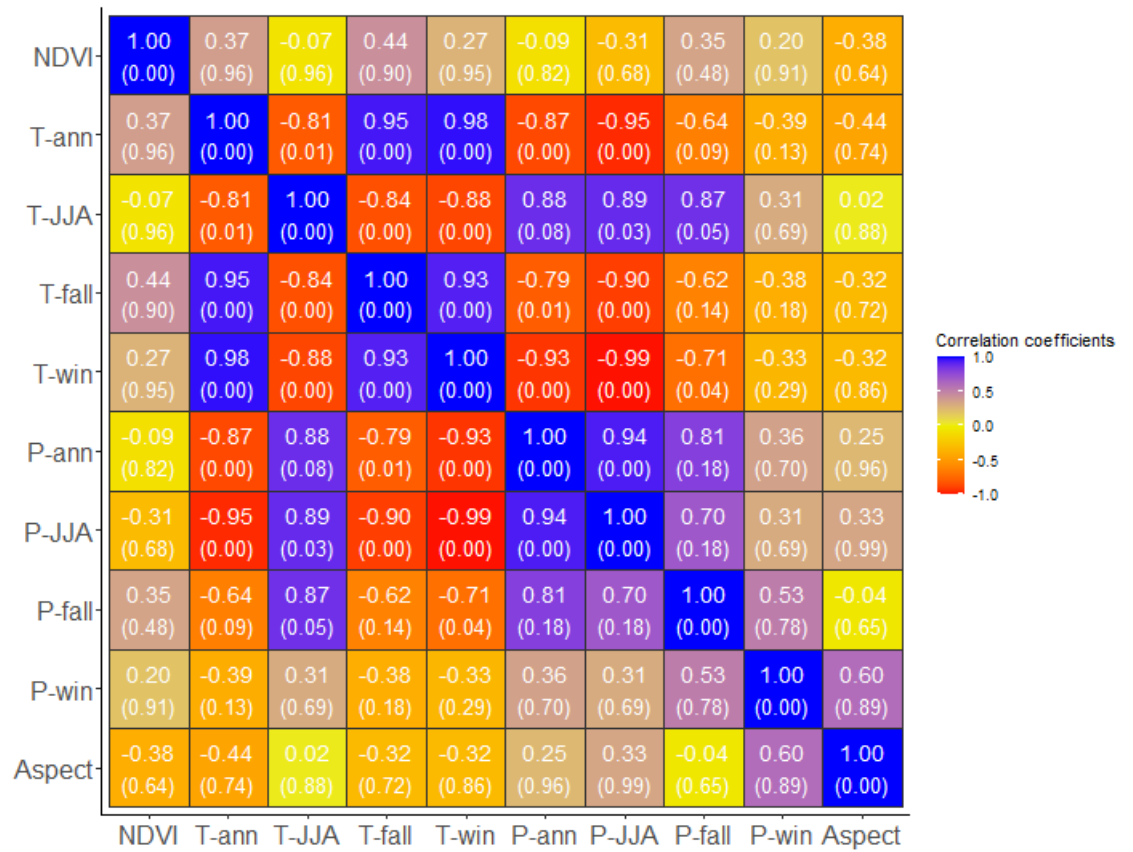

**Figure S12.** This figure presents the correlation matrix and Variance Inflation Factor (VIF) analysis results. The correlation matrix shows the relationships between the annual rate of change of climate variables (T and P) and the annual rate of change in NDVI for the period 1992-2020. The climate variables represent different time periods: Ann (annual), JJA (June to August), Win (December to February), and Fall (September to November). The correlation coefficients indicate the strength and direction of the relationships, while the figures in parentheses represent the p-values, providing information on the statistical significance of the correlations.

**Table S2.** Mean NDVI rate of increase and relative contribution to NDVI increase of cover types by vegetation zone.

| Vegetation zone        | Cover type                 | Area (km <sup>2</sup> ) | Area (%)    | Mean NDVI rate of increase (NDVI/yr) | Contribution to NDVI increase (%) | Con to NDVI - Area |
|------------------------|----------------------------|-------------------------|-------------|--------------------------------------|-----------------------------------|--------------------|
| Prostrate shrub tundra | Bedrock                    | 3187                    | 0.60        | 0.0029                               | 0.29                              | -0.3               |
|                        | Open area                  | 16548                   | 3.14        | 0.0036                               | 1.77                              | -1.4               |
|                        | Prostrate-shrub tundra     | 39291                   | 7.45        | 0.0039                               | 5.37                              | -2.1               |
|                        | Erect shrub (<30% cover)   | 1682                    | 0.32        | 0.0051                               | 0.32                              | 0.0                |
|                        | Erect shrub (30-70% cover) | 160                     | 0.03        | 0.0066                               | 0.04                              | 0.0                |
|                        | Wetland                    | 2599                    | 0.49        | 0.0044                               | 0.43                              | -0.1               |
|                        | <b>Total</b>               | <b>63467</b>            | <b>12.0</b> | <b>0.0038</b>                        | <b>8.2</b>                        | <b>-3.8</b>        |
| Erect shrub tundra     | Bedrock                    | 1655                    | 0.31        | 0.0042                               | 0.21                              | -0.1               |
|                        | Open area                  | 13603                   | 2.58        | 0.0051                               | 2.18                              | -0.4               |
|                        | Prostrate-shrub tundra     | 2715                    | 0.51        | 0.0044                               | 0.38                              | -0.1               |
|                        | Erect shrub (<30% cover)   | 57968                   | 11.00       | 0.0062                               | 12.64                             | 1.6                |
|                        | Erect shrub (30-70% cover) | 22284                   | 4.23        | 0.0067                               | 5.58                              | 1.4                |
|                        | Erect shrub (>70% cover)   | 1695                    | 0.32        | 0.0069                               | 0.41                              | 0.1                |
|                        | Wetland                    | 11363                   | 2.16        | 0.0059                               | 2.28                              | 0.1                |
|                        | <b>Total</b>               | <b>109628</b>           | <b>21.1</b> | <b>0.0061</b>                        | <b>23.7</b>                       | <b>2.6</b>         |
| Forest tundra          | Bedrock                    | 630                     | 0.12        | 0.0048                               | 0.09                              | 0.0                |
|                        | Open area                  | 13564                   | 2.57        | 0.0061                               | 2.60                              | 0.0                |
|                        | Prostrate-shrub tundra     | 10782                   | 2.05        | 0.0056                               | 1.76                              | -0.3               |
|                        | Erect shrub (<30% cover)   | 46826                   | 8.88        | 0.0066                               | 10.65                             | 1.8                |
|                        | Erect shrub (30-70% cover) | 30798                   | 5.84        | 0.0066                               | 7.07                              | 1.2                |
|                        | Erect shrub (>70% cover)   | 8776                    | 1.66        | 0.0062                               | 1.86                              | 0.2                |
|                        | Wetland                    | 4823                    | 0.91        | 0.0050                               | 0.76                              | -0.2               |
|                        | Lichen woodland            | 49083                   | 9.31        | 0.0061                               | 9.89                              | 0.6                |
|                        | Coniferous forest          | 38972                   | 7.39        | 0.0060                               | 7.67                              | 0.3                |
|                        | <b>Total</b>               | <b>179277</b>           | <b>38.7</b> | <b>0.0062</b>                        | <b>42.4</b>                       | <b>3.6</b>         |
| Spruce-lichen woodland | Bedrock                    | 182                     | 0.03        | 0.0030                               | 0.02                              | 0.0                |
|                        | Open area                  | 287                     | 0.05        | 0.0053                               | 0.05                              | 0.0                |
|                        | Erect shrub (<30% cover)   | 5554                    | 1.05        | 0.0050                               | 0.95                              | -0.1               |
|                        | Erect shrub (30-70% cover) | 1116                    | 0.21        | 0.0057                               | 0.22                              | 0.0                |
|                        | Erect shrub (>70% cover)   | 977                     | 0.19        | 0.0054                               | 0.18                              | 0.0                |
|                        | Wetland                    | 8776                    | 1.66        | 0.0043                               | 1.19                              | -0.5               |
|                        | Lichen woodland            | 71851                   | 13.63       | 0.0053                               | 12.45                             | -1.2               |
|                        | Coniferous forest          | 59408                   | 11.27       | 0.0055                               | 10.68                             | -0.6               |
|                        | <b>Total</b>               | <b>147682</b>           | <b>28.1</b> | <b>0.0053</b>                        | <b>25.7</b>                       | <b>-2.4</b>        |



**Table S3.** Interaction between surficial deposits and cover types. The symbol “+” stands for deposits which has an average annual rate of change in NDVI higher than the average annual rate of change in NDVI for all surficial deposits for one given cover class. The symbol “-” stands for deposits which has an average annual rate of change in NDVI lower than the average annual rate of change in NDVI for all surficial deposits for one given cover class. The number at the last line of the table represents the sum of the “+” symbols, indicating the number of cover types that have an annual rate of change in NDVI higher than all surficial deposits for a specific deposit.

|                                | Lacustrine<br>deposits | Fluvial de-<br>posits | Glacial and<br>glacioflu-<br>vial depos-<br>its | Slope and<br>weathering | Anthropo-<br>genic de-<br>posits | Marine de-<br>posits | Organic<br>deposits | Bedrocks<br>deposits | Coastal<br>marine de-<br>posits |
|--------------------------------|------------------------|-----------------------|-------------------------------------------------|-------------------------|----------------------------------|----------------------|---------------------|----------------------|---------------------------------|
| Bedrock                        | +                      | +                     | -                                               | -                       | +                                | -                    | +                   | -                    | -                               |
| Open area                      | +                      | +                     | +                                               | +                       | -                                | +                    | +                   | -                    | -                               |
| Prostrate-shrub<br>tundra      | +                      | +                     | +                                               | -                       | -                                | +                    | -                   | -                    | -                               |
| Erect shrub<br>(<30% cover)    | +                      | +                     | +                                               | +                       | -                                | +                    | -                   | +                    | -                               |
| Erect shrub (30-<br>70% cover) | +                      | +                     | +                                               | +                       | -                                | -                    | -                   | -                    | -                               |
| Erect shrub<br>(>70% cover)    | +                      | -                     | -                                               | +                       | +                                | -                    | -                   | -                    | -                               |
| Wetland                        | +                      | +                     | +                                               | -                       | -                                | +                    | -                   | -                    | -                               |
| Lichen woo-<br>dland           | +                      | +                     | +                                               | +                       | +                                | -                    | -                   | -                    | -                               |
| Coniferous fo-<br>rest         | +                      | +                     | +                                               | +                       | +                                | -                    | -                   | +                    | -                               |
|                                | 9                      | 8                     | 7                                               | 6                       | 4                                | 4                    | 2                   | 2                    | 0                               |

**Table S4.** Most plausible models to explain the annual rate of change in NDVI in each of the vegetation zone in Nunavik. T<sub>ann</sub>: Annual temperature; T<sub>jja</sub>: Summer temperature; T<sub>fall</sub>: Fall temperature; T<sub>win</sub>: Winter temperature; P<sub>ann</sub>: Annual precipitation; P<sub>jja</sub>: Summer precipitation; P<sub>fall</sub>: Fall precipitation; P<sub>win</sub>: Winter precipitation; Surf. Dep: Surficial deposits. Green crosses indicate a positive and significant relationship between the climate variable and the annual rates of change in NDVI in the model, while red crosses indicate negative and significant relationship.

|                           | T <sub>ann</sub> | T <sub>jja</sub> | T <sub>fall</sub> | T <sub>win</sub> | P <sub>ann</sub> | P <sub>jja</sub> | P <sub>fall</sub> | P <sub>win</sub> | Aspect | Surf. Dep<br>* cover<br>class | AIC      | ΔAIC  | R <sup>2</sup>   |
|---------------------------|------------------|------------------|-------------------|------------------|------------------|------------------|-------------------|------------------|--------|-------------------------------|----------|-------|------------------|
| Prostrate<br>shrub tundra |                  | X                |                   |                  |                  |                  |                   | X                |        | X                             | -1214382 | -     | 0.142            |
|                           |                  | X                |                   |                  |                  |                  | X                 |                  |        | X                             | -1214364 | 18    | 0.142            |
|                           |                  |                  |                   |                  |                  |                  |                   |                  |        | X                             | -1214118 | 264   | 0.111            |
|                           | X                |                  |                   |                  |                  |                  |                   |                  |        | X                             | -1212560 | 1822  | 0.121            |
|                           |                  | X                |                   |                  |                  |                  |                   | X                |        | X                             | -1212456 | 1926  | 0.128            |
|                           |                  |                  |                   |                  | X                |                  |                   |                  |        | X                             | -1211781 | 2601  | 0.118            |
| Best climatic<br>model    |                  | X                |                   |                  |                  |                  | X                 | X                | N.A.   | N.A.                          | 11435    | 0.055 | -<br>120294<br>7 |
| Erect shrub<br>tundra     |                  |                  |                   |                  |                  |                  |                   |                  |        | X                             | -3373883 | -     | 0.109            |
|                           |                  | X                |                   |                  |                  |                  | X                 | X                |        | X                             | -3372410 | 1472  | 0.133            |
|                           |                  | X                |                   |                  |                  |                  |                   | X                |        | X                             | -3372272 | 1610  | 0.133            |
|                           |                  |                  |                   |                  |                  |                  |                   | X                |        | X                             | -3371068 | 2814  | 0.130            |
|                           |                  |                  |                   |                  |                  | X                |                   |                  |        | X                             | -3368197 | 5685  | 0.123            |
|                           |                  | X                |                   |                  |                  |                  | X                 |                  |        | X                             | -3365362 | 8521  | 0.115            |
| Best climatic<br>model    |                  | X                |                   |                  |                  |                  | X                 | X                | N.A.   | N.A.                          | -3335093 | 38790 | 0.035            |
| Forest tundra             |                  |                  |                   |                  |                  |                  |                   |                  |        | X                             | -7269416 | -     | 0.074            |
|                           | X                |                  |                   |                  |                  |                  |                   |                  |        | X                             | -7268908 | 507   | 0.082            |
|                           |                  |                  |                   |                  | X                |                  |                   |                  |        | X                             | -7265938 | 3477  | 0.078            |
|                           |                  | X                |                   |                  |                  |                  |                   | X                |        | X                             | -7263811 | 5604  | 0.076            |
|                           |                  | X                |                   |                  |                  |                  |                   | X                |        | X                             | -7263716 | 5699  | 0.075            |
|                           |                  |                  |                   |                  |                  |                  |                   | X                |        | X                             | -7263232 | 6183  | 0.075            |
| Best climatic<br>model    |                  | X                |                   |                  |                  |                  | X                 | X                | N.A.   | N.A.                          | -7211128 | 58287 | 0.005            |
| Spruce-lichen<br>woodland |                  | X                |                   |                  |                  |                  | X                 | X                |        | X                             | -6217164 | -     | 0.121            |
|                           |                  | X                |                   |                  |                  |                  | X                 |                  |        | X                             | -6215901 | 1263  | 0.119            |
|                           |                  |                  |                   |                  |                  |                  | X                 |                  |        | X                             | -6215041 | 2122  | 0.118            |
|                           |                  | X                |                   |                  |                  |                  | X                 | X                |        |                               | -6210211 | 6953  | 0.122            |
|                           |                  | X                |                   |                  |                  |                  | X                 |                  |        |                               | -6208888 | 8275  | 0.120            |
|                           |                  |                  |                   |                  |                  |                  | X                 |                  | X      | X                             | -6208051 | 9113  | 0.119            |
| Best climatic<br>model    |                  | X                |                   |                  |                  |                  | X                 | X                | N.A.   | N.A.                          | -6174737 | 42426 | 0.059            |
